# Supplementary material for: Interaction between subventricular zone microglia and neural stem cells impacts the neurogenic response in a mouse model of cortical ischemic stroke
Source: PubMed Central journal article supplement (PMC11502905; doi:10.1038/s41467-024-53217-1), 2024-10-24
Supplement: 41467_2024_53217_MOESM1_ESM.pdf [file 41467_2024_53217_MOESM1_ESM.pdf]

**Interaction between subventricular zone microglia and neural stem cells impacts the neurogenic response in a mouse model of cortical ischemic stroke**

Nath *et al.*

Supplementary Information

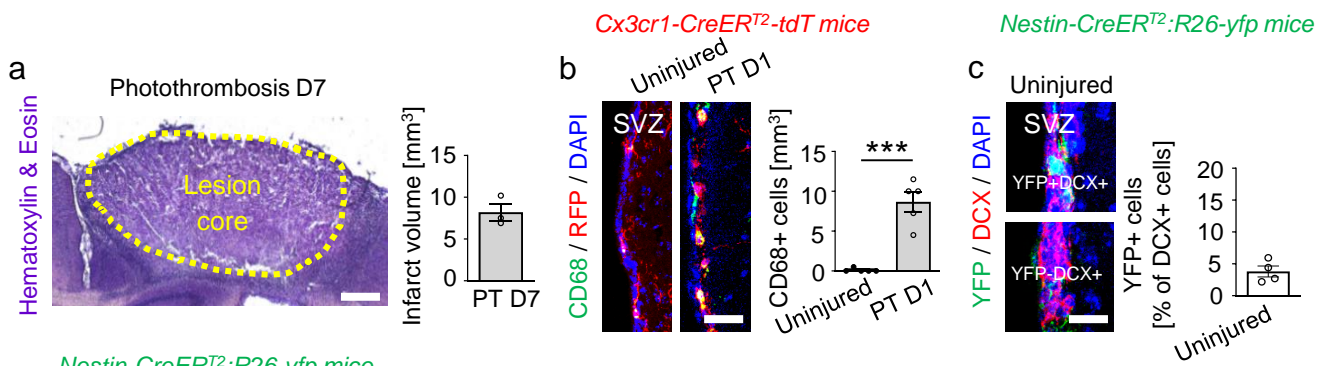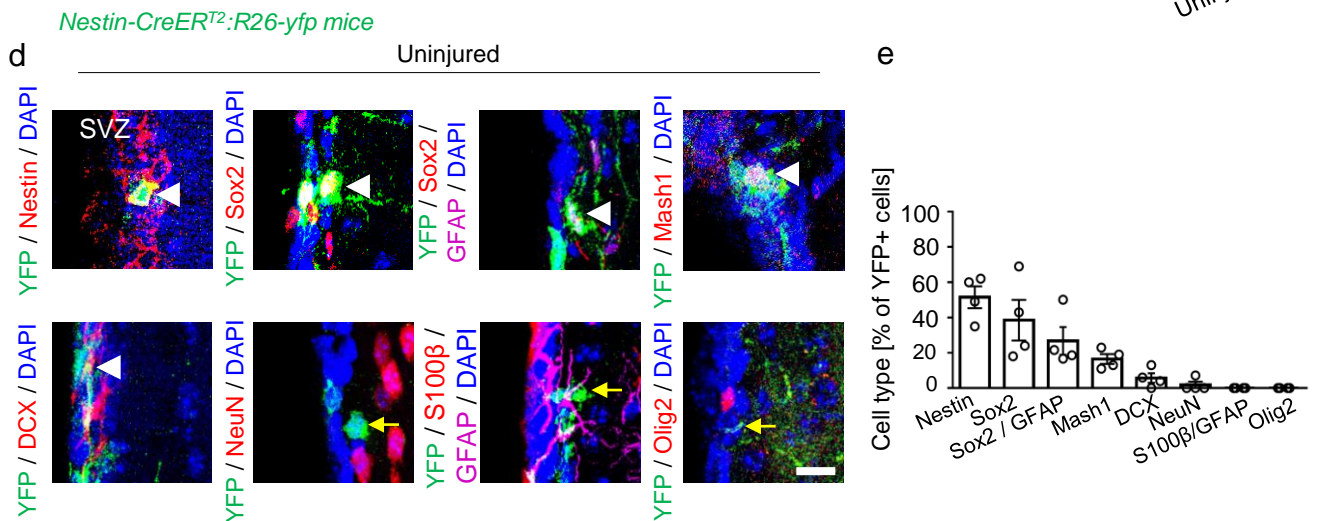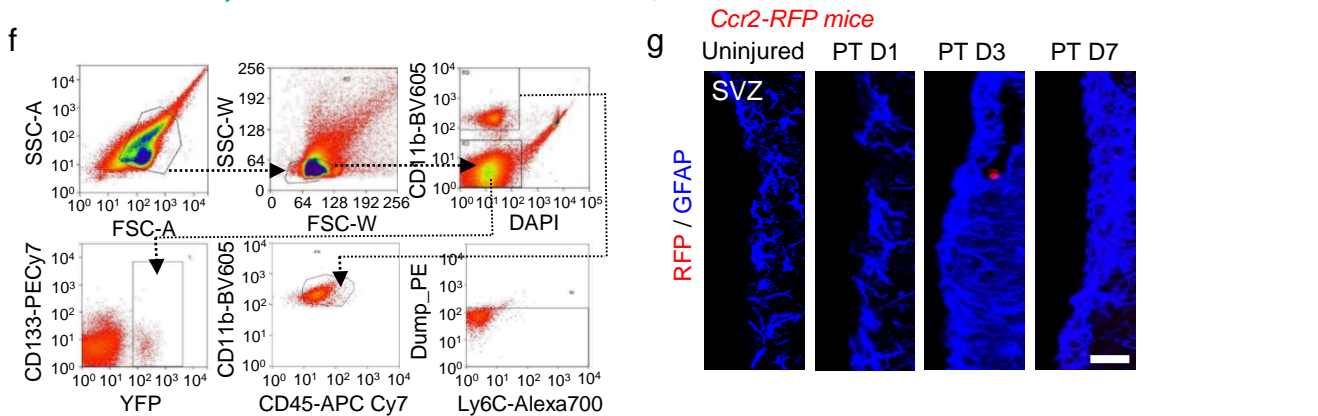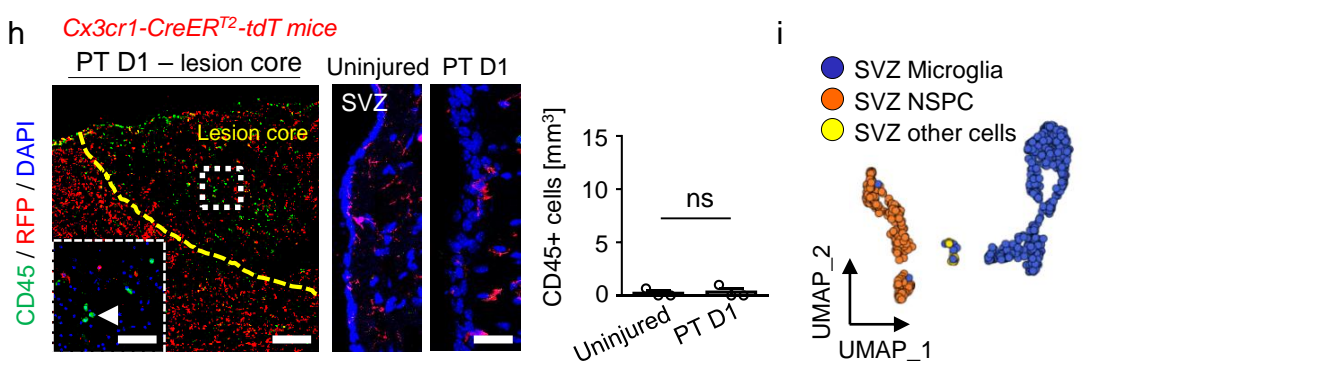

**Supplementary Fig. 1. Cluster identification of the scRNA-Seq dataset.** **a**, Hematoxylin and eosin staining of brain sections 7 days after PT. Dotted yellow line delineates lesion core. Scale, 240  $\mu\text{m}$ . Quantification of the infarct volume of mice at day 7 after PT ( $n = 3$  mice). **b**, Immunolabeling for CD68 and RFP in the SVZ 1 day after PT. Scale, 36  $\mu\text{m}$ . Quantification of the number of CD68+ cells in the SVZ 1 day after PT ( $n = 5$ ). **c**, Immunolabeling for YFP and DCX in the SVZ of uninjured *Nestin-CreER<sup>T2</sup>:R26-yfp* mice 12 days after the last tamoxifen injection. Scale, 12  $\mu\text{m}$ . Quantification of the percentage of YFP+DCX+ cells relative to all DCX+ cells ( $n = 4$ ). **d**, Immunolabeling for YFP with Nestin, Sox2, GFAP, Mash1, DCX, NeuN, S100 $\beta$ , and Olig2 labeling in the SVZ of uninjured *Nestin-CreER<sup>T2</sup>:R26-yfp* mice. Arrowheads indicate YFP+marker+ and arrows indicate YFP+marker- cells for the marker combinations. Scale, 8  $\mu\text{m}$ . **e**, Quantification of percentage of cell types per total YFP+ cells in the SVZ ( $n = 4$ ). **f**, FACS isolation of SVZ YFP+ NSPCs and CD11b+CD45<sup>low</sup> microglia. **g**, Immunolabeling for RFP+ blood-derived circulating monocytes (red) in the SVZ at the indicated times after PT and in uninjured *Ccr2-RFP* reporter mice ( $n = 5$  mice). Scale, 18  $\mu\text{m}$ . **h**, Immunolabeling for CD45 and RFP in the lesion core (left) and in the SVZ 1 day after PT. Dashed box indicates magnified area showing CD45+ cells in the lesion core (arrowhead). Scales, 180  $\mu\text{m}$  (lesion core), left; 90  $\mu\text{m}$ , magnification; 30  $\mu\text{m}$ , SVZ. Quantification of CD45+ cells in the SVZ in uninjured mice and 1 day after PT ( $n = 3$  mice). **i**, UMAP representation of 658 individual NSPCs and microglia from the SVZ 1 and 7 days after PT and uninjured mice measured by scRNA-Seq. Each dot represents an individual cell. All plots show the mean  $\pm$  SEM. ns, no significant; \*\*\* $P < 0.001$ , unpaired Student's *t*-tests (b, h). SVZ, subventricular zone. Source data are provided as a Source Data file.

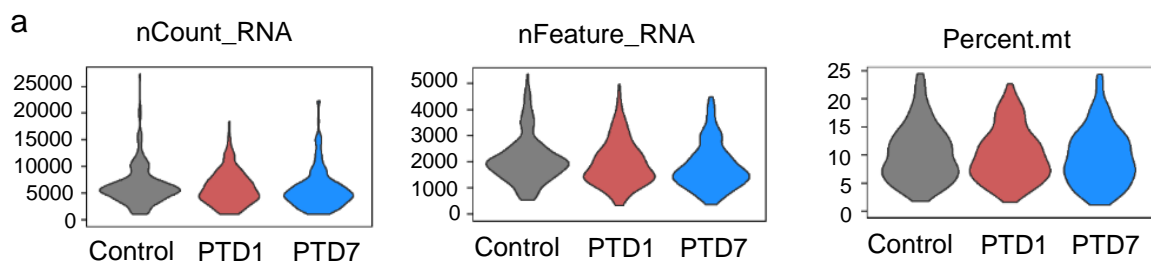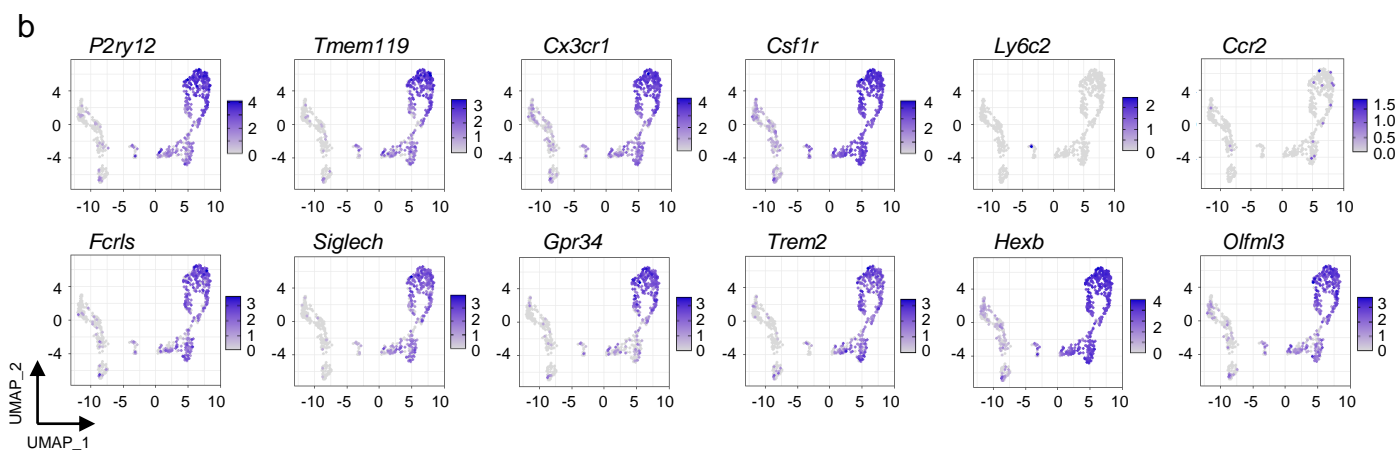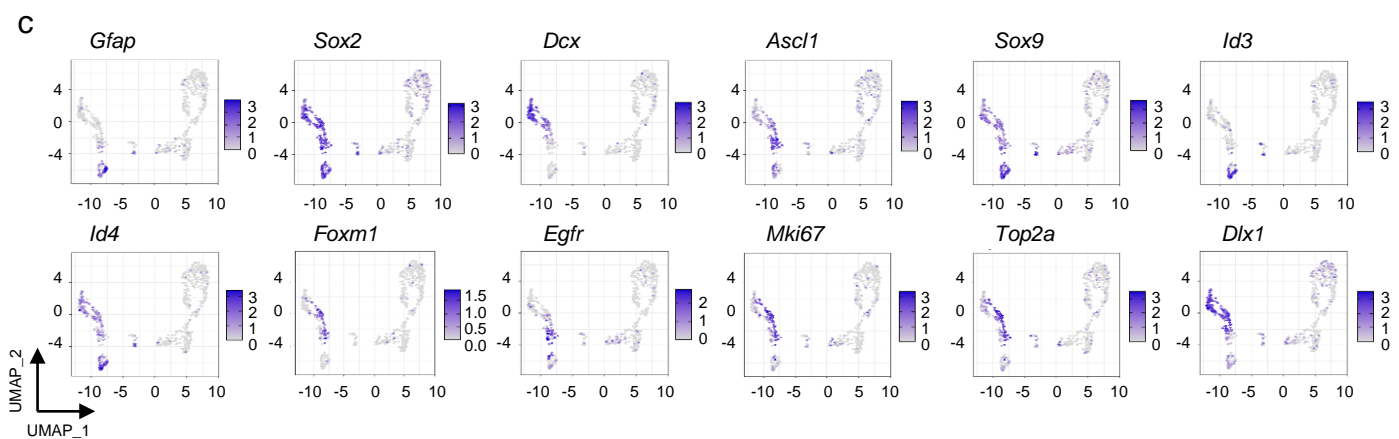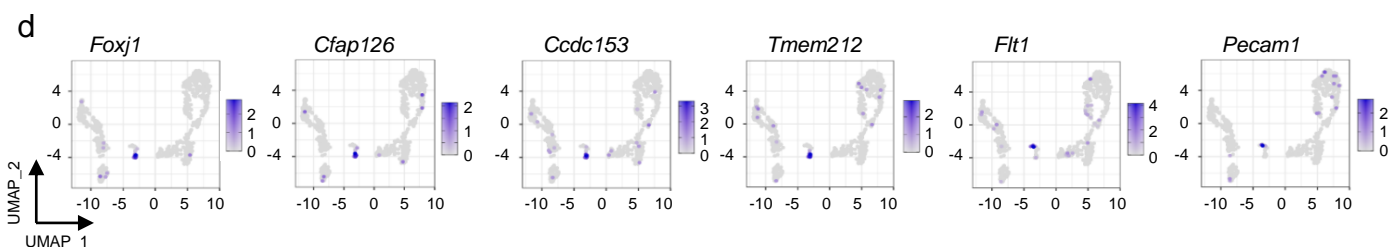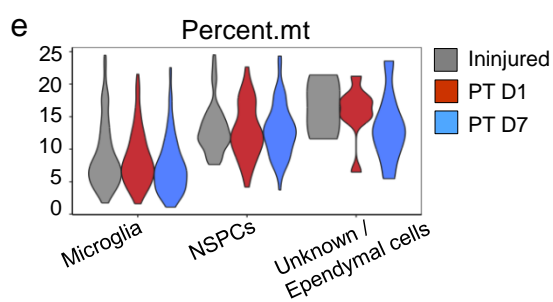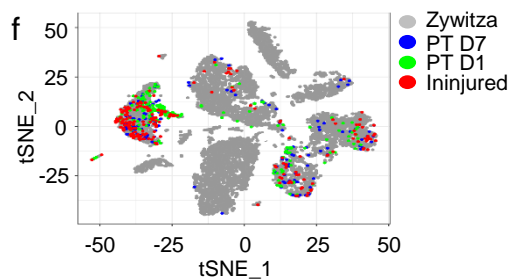

**Supplementary Fig. 2. Quality-control metrics and cluster identification for the scRNA-Seq dataset.** **a**, Violin plots depicting number of genes and unique features related to genes, and percentage of transcripts mapping to the mitochondrial genome 1 and 7 days after PT and in the uninjured control. **b**, UMAP plots colored for expression of canonical genes to verify the microglial cluster. **c**, UMAP plots colored for expression of canonical genes to verify the NSPC cluster. **d**, UMAP plots colored for expression of canonical genes to verify the mixed cell population cluster. **e**, Violin plots of mitochondrial genes enriched in different cell populations. **f**, t-SNE plot of microglia cells with the time point of origin, compared with Zywitza's study<sup>11</sup>.

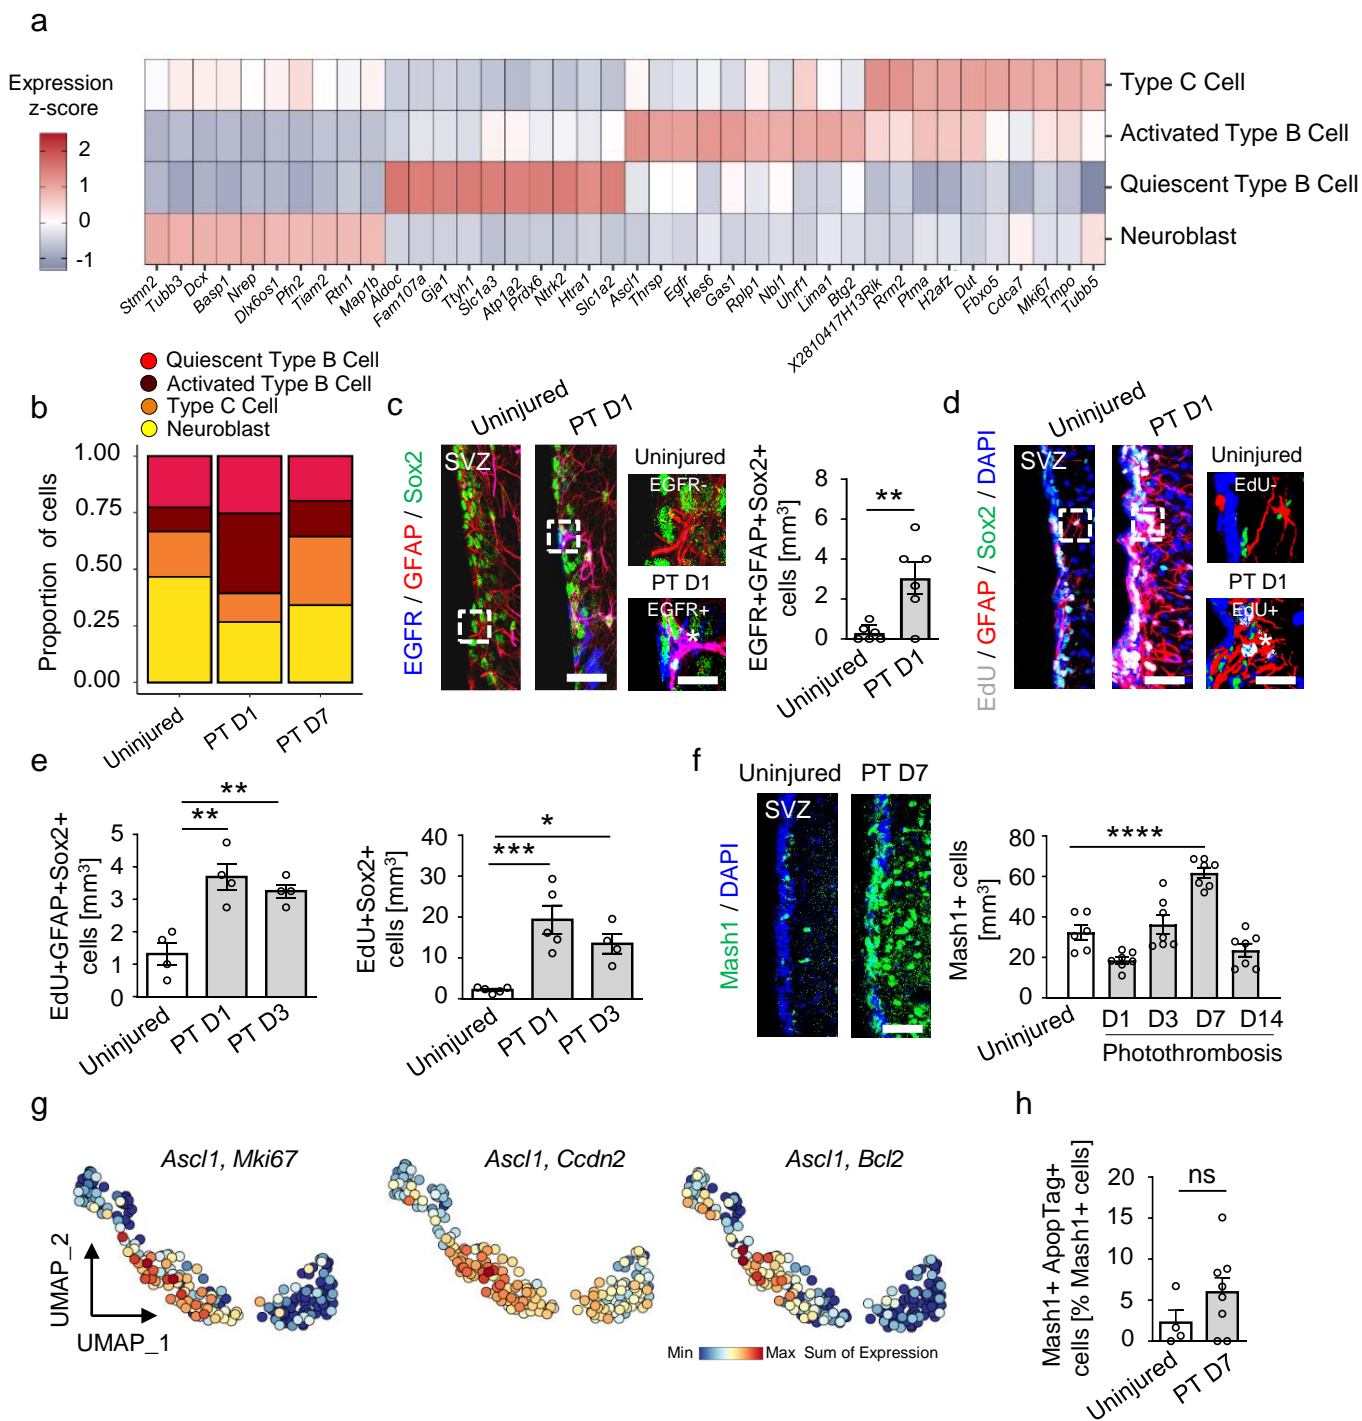

**Supplementary Fig. 3. NSPC activation and apoptosis in the SVZ after cortical stroke.**

**a**, Heat map of the top-10 differentially expressed genes (DEGs) in NSPC clusters. **b**, Quantification of NSPC cluster proportions 1 and 7 days after PT and in uninjured mice. **c**, Immunolabeling for EGFR, GFAP, and Sox2 in uninjured mice and 1 day after PT. The white dashed boxes indicate magnification of EGFR<sup>-</sup>GFAP<sup>+</sup>Sox2<sup>+</sup> quiescent type B (right, top) and EGFR<sup>+</sup>GFAP<sup>+</sup>Sox2<sup>+</sup> activated type B cells (star) (right, bottom) in the SVZ in an uninjured mouse and 1 day after PT, respectively. Scales, 25  $\mu$ m, left; 12  $\mu$ m, magnification. Quantification of EGFR<sup>+</sup>GFAP<sup>+</sup>Sox2<sup>+</sup> cells in the SVZ per area 1 day after PT and in uninjured mice (n = 6). **d**, Immunolabeling for EdU, GFAP, and Sox2 in the SVZ in uninjured mice and 1 day after PT. Dashed boxes indicate the magnification of an EdU<sup>-</sup>GFAP<sup>+</sup>Sox2<sup>+</sup> quiescent type B cell (right, top) and an EdU<sup>+</sup>GFAP<sup>+</sup>Sox2<sup>+</sup> activated type B cell (star) (right, bottom) in uninjured mice and 1 day after PT, respectively. Scale bars, 27  $\mu$ m, left; 10  $\mu$ m, magnification. **e**, Quantification of EdU<sup>+</sup>GFAP<sup>+</sup>Sox2<sup>+</sup> (n = 4) and EdU<sup>+</sup>Sox2<sup>+</sup> (n = 5 mice, uninjured, PT D1; n = 4, PT D3) cells in the SVZ per area 1 day and 3 days after PT and in uninjured mice. **f**, Immunolabeling for Mash1 (green) in the SVZ 7 days after PT, compared with uninjured mice. Scale, 27  $\mu$ m. Quantification of Mash1<sup>+</sup> cells in the SVZ per area 1, 3, 7, and 14 days after PT, and in uninjured mice (n = 6, uninjured; n = 7, PT D1-D14). **g**, *Ascl1*<sup>+</sup> proliferative type C cells co-express *Mki67*, *Ccdn2*, and *Bcl2*, as in the projected expression of the UMAP after PT. **h**, Quantification of Mash1<sup>+</sup>ApopTag<sup>+</sup> cell percentage in the SVZ 7 days after PT, compared with uninjured mice (n = 4, uninjured; n = 8, PT D7). All graphs show the mean  $\pm$  SEM. \*P<0.05, \*\*P<0.01, \*\*\*P<0.001, \*\*\*\*P<0.0001, ns not significant, one-way ANOVAs with Bonferroni corrections for multiple comparisons (e, f) and unpaired Student's *t*-tests (c, h). SVZ, subventricular zone. Source data are provided as a Source Data file.

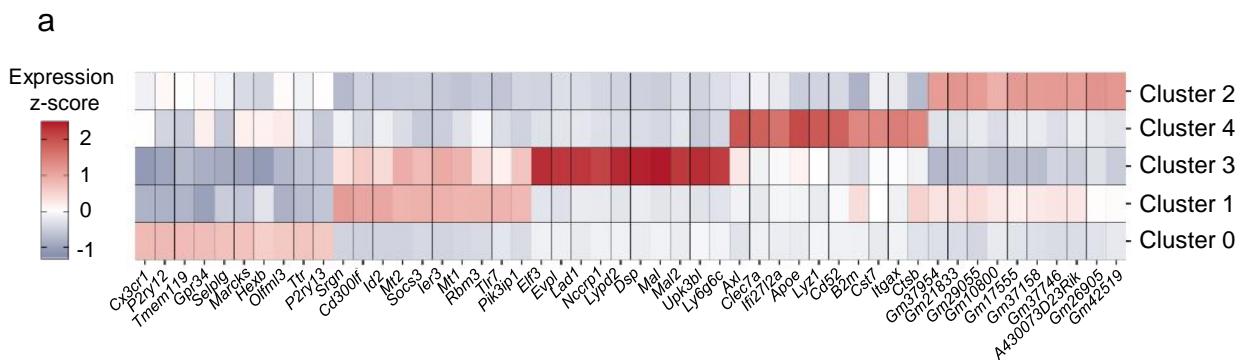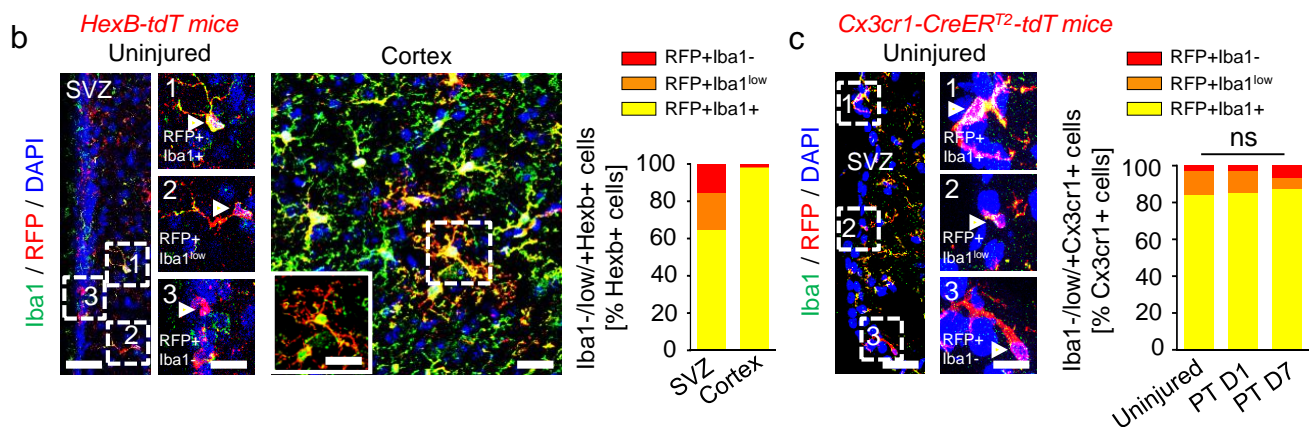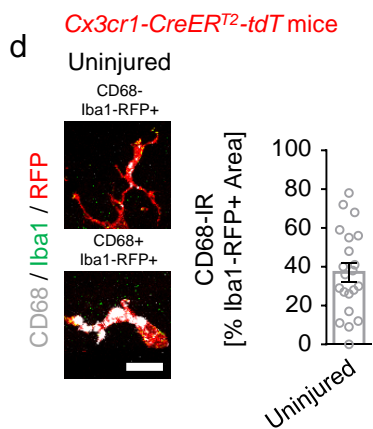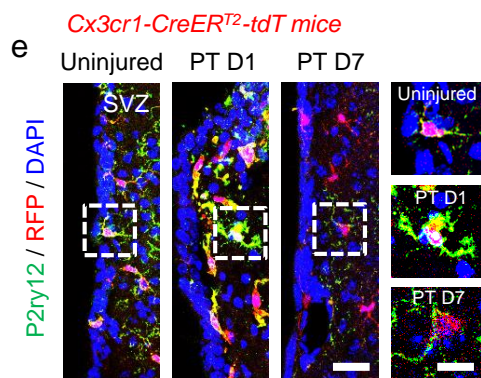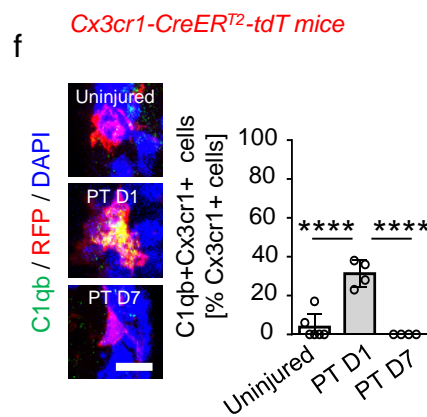



**Supplementary Fig. 4. SVZ microglial molecular heterogeneity after PT.** **a**, Heat map of the top-10 DEGs in microglial clusters. **b**, Immunolabeling for Iba1 and RFP in the SVZ (left) and cortex (right) of uninjured *HexB-tdTomato* mice. White boxes indicate magnifications of a RFP+Iba1+ cell (left, top), a RFP+Iba1<sup>low</sup> cell (left, middle) and a RFP+Iba1- cell (left, bottom) in the SVZ, and a RFP+Iba1+ cell (right, bottom) in the cortex. Examples of each cell type are indicated by arrowheads. Scales, 20  $\mu$ m, SVZ; 10  $\mu$ m, magnifications of SVZ cells; 35  $\mu$ m, cortex; 8  $\mu$ m, magnification of the cortical cell. Quantification of the percentage of RFP+Iba1+, RFP+Iba1<sup>low</sup> and RFP+Iba1- cells in the SVZ and cortex of uninjured mice (n = 4 mice). **c**, Immunolabeling for Iba1 and RFP in the SVZ of uninjured *Cx3cr1-CreER<sup>T2</sup>:R26-tdTomato* mice. Boxes indicate magnifications of RFP+Iba1+ (right, top), RFP+Iba1<sup>low</sup> cells (right, middle) and a RFP+Iba1- cell (right, bottom) in the SVZ. Examples of each type of cell are indicated by the white arrowheads. Scales, 33  $\mu$ m, SVZ; 9  $\mu$ m, magnifications. Quantification of the percentage of RFP+Iba1+, RFP+Iba1<sup>low</sup>, and RFP+Iba1- cells in the SVZ of uninjured mice and mice 1 day and 7 days after PT (n = 3). **d**, Immunolabeling for CD68, Iba1, and RFP in the SVZ of uninjured *Cx3cr1-CreER<sup>T2</sup>:R26-tdTomato* mice representing CD68+Iba1-RFP+ (bottom) and CD68-Iba1-RFP+ cells (top). Scale, 12  $\mu$ m. Quantification of the CD68 immunoreactivity (IR) in Iba1-RFP+ cells in the SVZ of uninjured mice (n = 3 mice, a total of 21 cells were analyzed). **e**, Immunolabeling for P2ry12 and RFP in the SVZ of uninjured *Cx3cr1-CreER<sup>T2</sup>:R26-tdTomato* mice and mice 1 and 7 days after PT. Boxes indicate magnification of representative cells showing P2ry12 expression at 1 and 7 days after PT and in uninjured mice (n = 3). Scales, 25  $\mu$ m; 8  $\mu$ m, magnifications. **f**, Immunolabeling for C1qb and RFP of uninjured *Cx3cr1-CreER<sup>T2</sup>:R26-tdTomato* mice and mice 1 and 7 days after PT. Scale, 8  $\mu$ m. Quantification of the percentage of C1qb<sup>+</sup> cells of uninjured mice and mice 1 and 7 days after PT (n = 6, uninjured; n = 4, PT D1, PT D7). All graphs show the mean  $\pm$  SEM. \*\*\*\*P<0.0001, ns not significant, one-way ANOVAs with Bonferroni corrections for multiple comparisons. SVZ, subventricular zone. Source data are provided as a Source Data file.

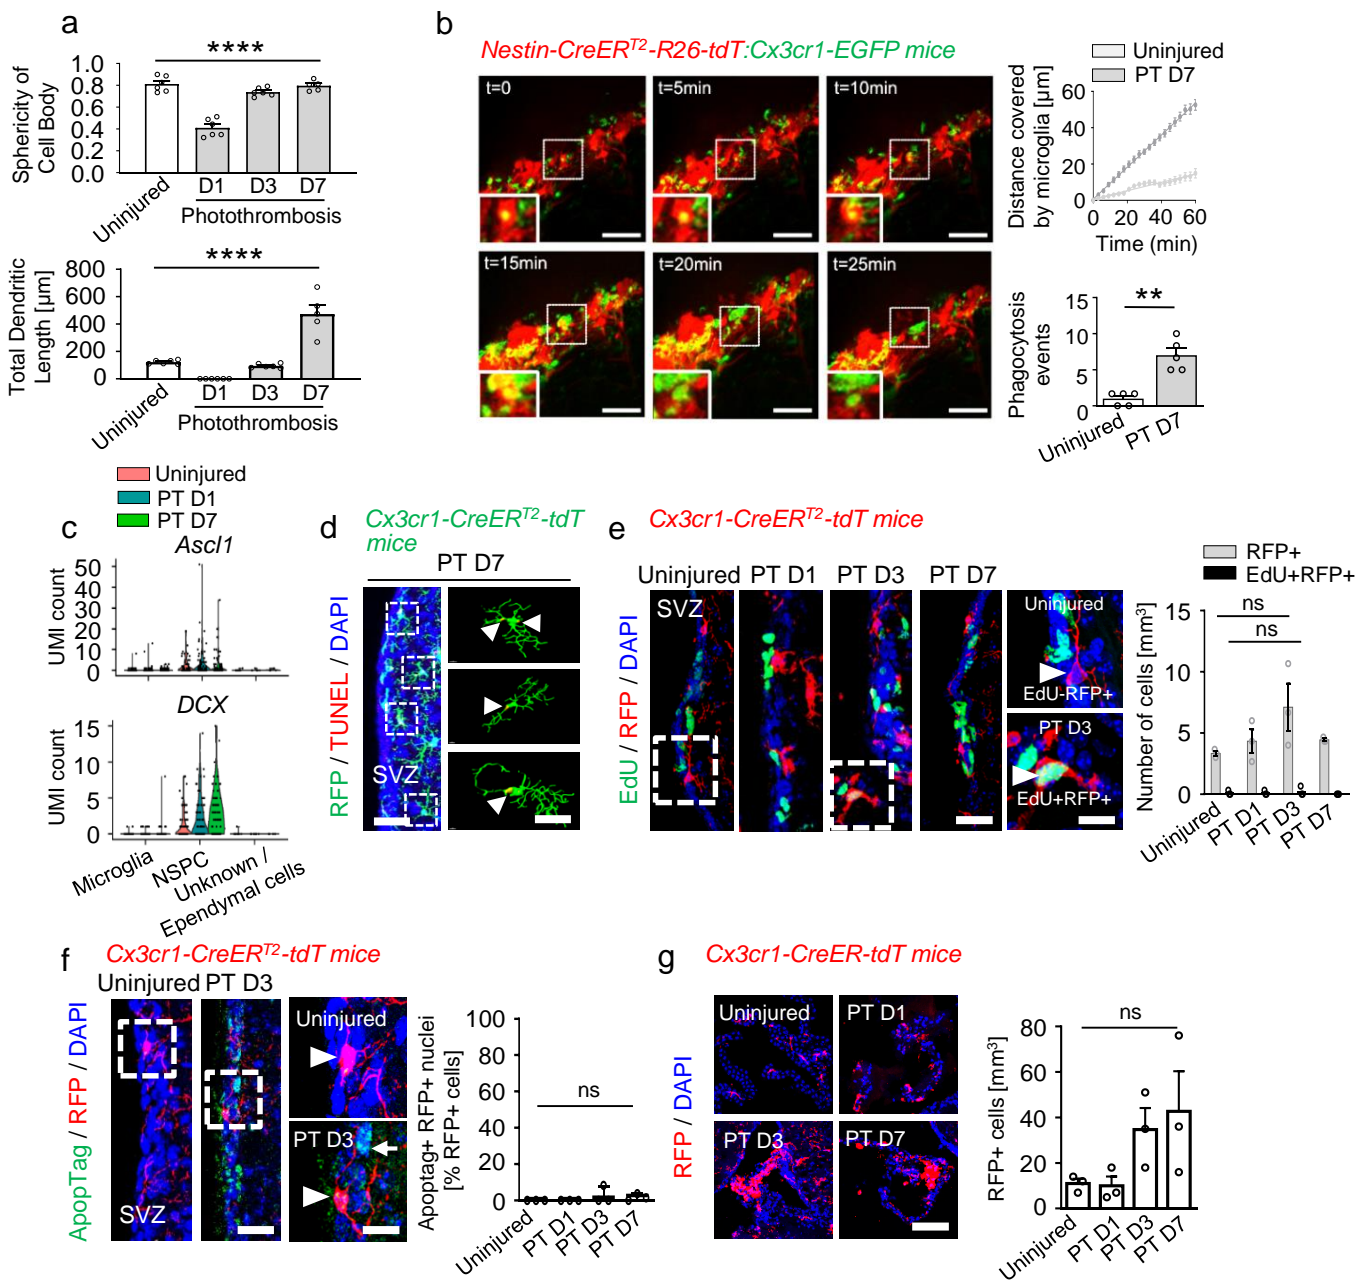

**Supplementary Fig. 5. Activated SVZ microglia phagocytose dying neuroblasts after PT.** **a**, IMARIS-based automatic quantification of cell morphology of GFP+ microglia 1, 3, and 7 days after PT (n = 6, uninjured, PT D1, PT D3; n = 5, PT D7). **b**, Time-lapse imaging montages revealed phagocytosis of tdT+ NSPCs by GFP+ microglia in the SVZ of *Nestin-CreERT<sup>2</sup>-R26-tdTomato:Cx3cr1-EGFP* mice. Magnification of regions indicated shows phagocytosis of an NSPC by a microglial cell (bottom insets). Scale, 10  $\mu$ m. Quantification of velocity dynamics of microglia and phagocytosis events 7 days after PT compared with uninjured control in SVZ acute slices (velocity: n = 2 (35 cells), uninjured; n = 3 (62 cells), 7 days after PT; phagocytosis events: n = 2, uninjured (5 slices); n = 3, 7 days after PT (5 slices)). **c**, Analysis of NSPC RNA in microglia. Violin plots for the type C cell and neuroblast genes *Ascl1* and *Dcx* in SVZ microglia. **d**, Immunolabeling for RFP and TUNEL dying cells 7 days after PT. Dashed boxes indicate 3-D IMARIS reconstruction of the spatial localization of TUNEL+ dying cell fragments revealing microglia phagocytosis of dying cells (right, arrowheads) (n = 3). Scales, 30  $\mu$ m, left; 5  $\mu$ m, magnifications. **e**, Immunolabeling for EdU and RFP in the SVZ 1, 3, and 7 days after PT and uninjured mice. Dashed boxes indicate magnification of an EdU-RFP+ microglial cell (right, top, arrowhead) and an EdU+RFP+ proliferating microglial cell (right, bottom, arrowhead) in the SVZ in uninjured mice and 3 days after PT, respectively. Scales, 48  $\mu$ m, left; 14  $\mu$ m, magnifications. Quantification of RFP+ and EdU+RFP+ cells in the SVZ 1, 3, and 7 days after PT compared to uninjured mice (n = 3). **f**, Immunolabeling for ApopTag and RFP in the SVZ 3 days after PT and uninjured mice. Dashed boxes indicate magnification of ApopTag-RFP+ microglia (arrowheads). An ApopTag+ cell is indicated by an arrow. Scales, 24  $\mu$ m, left; 12  $\mu$ m, magnifications. Quantification of the percentage of ApopTag+RFP+ cells in the SVZ 1, 3, and 7 days after PT, compared with uninjured mice (n = 3 mice). **g**, Immunolabeling for RFP in the choroid plexus 1, 3, and 7 days after PT, compared with uninjured mice. Scale, 80  $\mu$ m. Quantification of RFP+ cells in the choroid plexus in uninjured mice and at different times after PT (n = 3). All graphs show the mean  $\pm$  SEM. \*\*P<0.01, \*\*\*\*P<0.0001, ns, not significant, one-way ANOVAs with Bonferroni corrections for multiple comparisons (a, e-g), Mann-Whitney test (b). SVZ, subventricular zone. Source data are provided as a Source Data file.

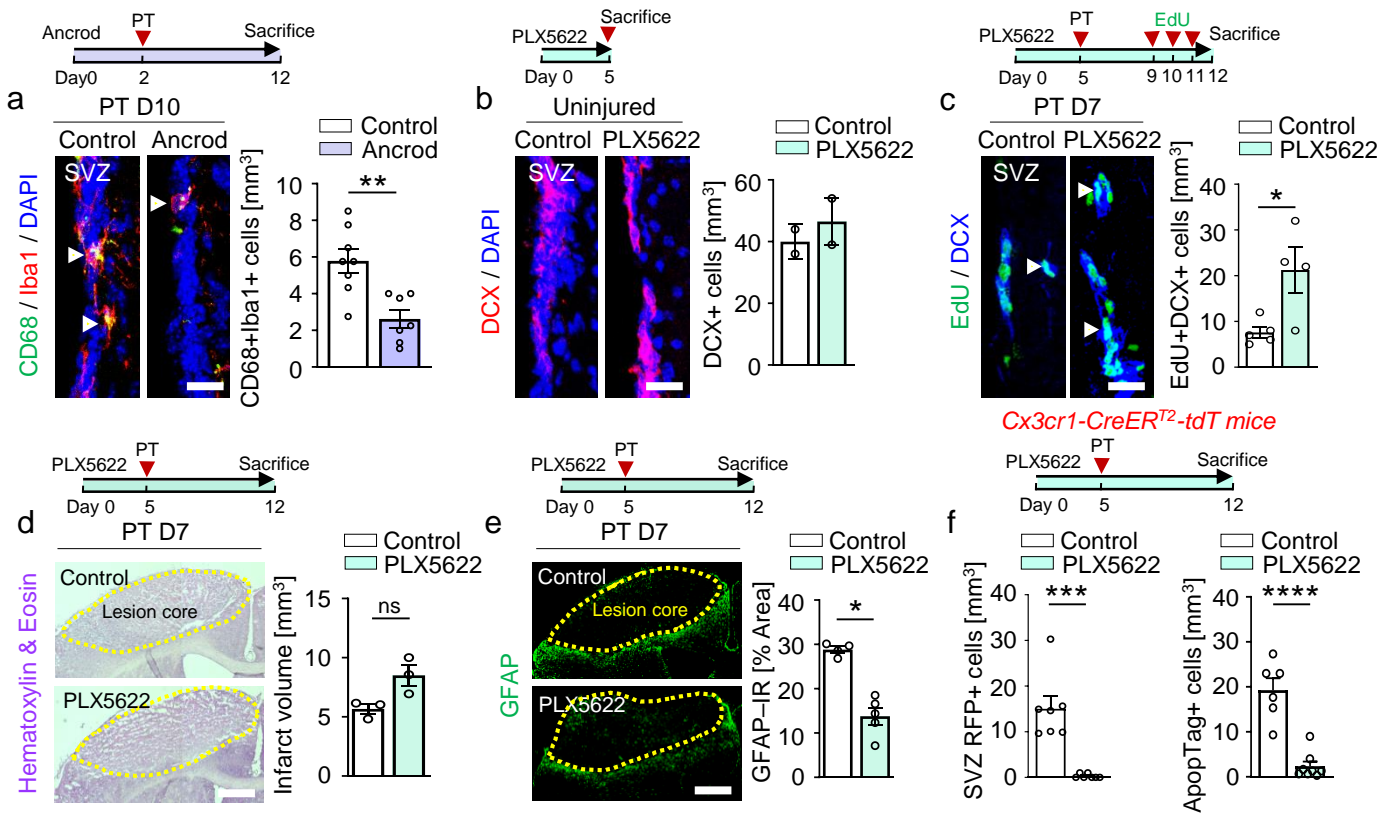

**Supplementary Fig. 6. Depletion of SVZ microglia increases the newborn neuroblast cell number after PT.** **a**, Immunolabeling for CD68 and Iba1 in the SVZ of fibrinogen-depleted mice and control mice 10 days after PT. Arrowheads indicate CD68+Iba1+ cells. Scale, 16  $\mu$ m. Quantification of CD68+Iba1+ cells in the SVZ of fibrinogen-depleted mice and control mice 10 days after PT ( $n = 8$ , control;  $n = 7$ , anicrod). **b**, Immunolabeling for DCX (red) in the SVZ of PLX5622-fed or control uninjured mice. Scale, 13  $\mu$ m. Quantification of DCX+ cells in the SVZ in PLX5622-fed or control uninjured mice ( $n = 2$ ). **c**, Immunolabeling for EdU and DCX in the SVZ of PLX5622-fed or control mice 7 days after PT. Arrowheads indicate EdU+DCX+ cells. Scale bar, 19  $\mu$ m. Quantification of EdU+DCX+ cells in the SVZ in PLX5622-fed and control mice 7 days after PT ( $n = 5$  mice, control;  $n = 4$  mice, PLX5622). **d**, Hematoxylin and eosin staining of the brain cortex 7 days after PT in PLX5622-treated and control mice. Area delineated by dotted line corresponds to lesion core. Scale, 500  $\mu$ m. Quantification of infarct volume ( $n = 3$ ). **e**, Immunolabeling for GFAP in the cortex 7 days after PT in PLX5622-treated and control mice. Area delineated by the dotted yellow line corresponds to the lesion core. Scale bar, 600  $\mu$ m. Quantification of GFAP-immunoreactivity in the glial border ( $n = 4$ , control;  $n = 5$ , PLX5622). **f**, Quantification of RFP+ microglia and ApopTag+ cells in the SVZ in PLX5622-fed mice 7 days after PT, compared with control group 7 days after PT ( $n = 7$  mice for microglial quantification (left graph);  $n = 6$ , control;  $n = 8$ , PLX5622 for ApopTag quantification (right graph)). All graphs show the mean  $\pm$  SEM. \* $P < 0.05$ , \*\* $P < 0.01$ , \*\*\* $P < 0.001$ , \*\*\*\* $P < 0.0001$ , ns, not significant, Mann-Whitney test (d-e), and unpaired Student's  $t$ -tests (a, c, f). SVZ, subventricular zone. Source data are provided as a Source Data file.

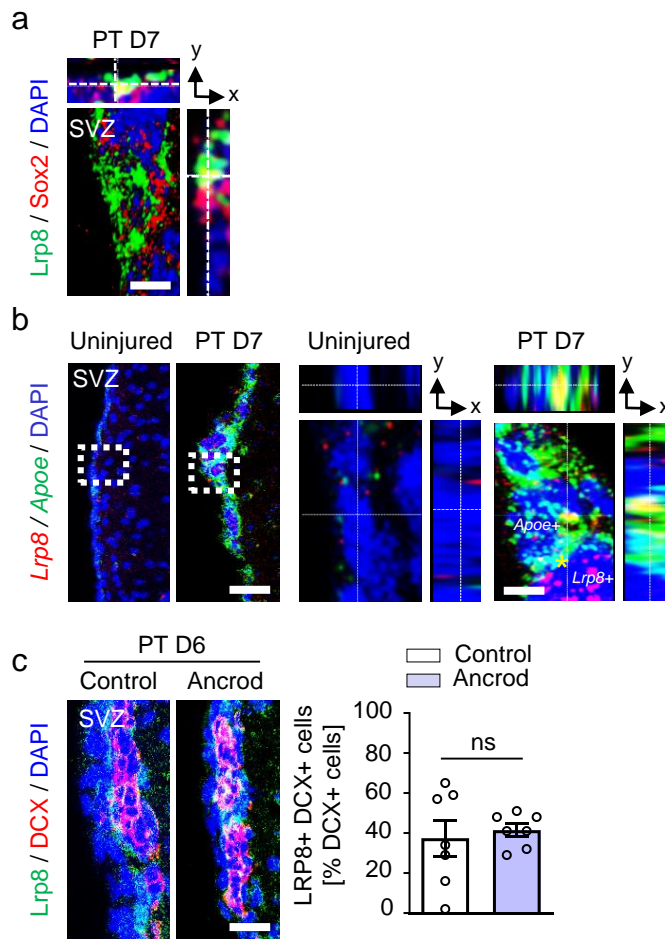

**Supplementary Fig. 7. Lrp8 and ApoE expression in SVZ NSPCs and microglia after PT.** **a**, Representative immunolabeling image showing Lrp8 (green) and Sox2 (red) in the SVZ 7 days after PT ( $n = 4$  mice). Scale bar, 10  $\mu\text{m}$ . **b**, *In situ* hybridization for *Lrp8* (red) and *ApoE* (green) 7 days after PT, compared with uninjured mice. White dashed boxes indicate the magnification of an *Lrp8*<sup>+</sup> cell next to a *ApoE*<sup>+</sup> cell (yellow asterisk) in the SVZ 7 days after PT, compared with *Lrp8*<sup>-</sup> and *ApoE*<sup>-</sup> cells in the SVZ of uninjured mice ( $n = 2$  mice, uninjured;  $n = 4$  mice, PT D7). Scale bars, 27  $\mu\text{m}$ , left; 7  $\mu\text{m}$ , right. **c**, Immunolabeling for Lrp8 (green) and DCX (red) in the SVZ in fibrinogen-depleted mice compared with control-treated mice 6 days after PT. Scale bar, 20  $\mu\text{m}$ . Quantification of the percentage of Lrp8+DCX+ cells in fibrinogen-depleted mice compared with control-treated mice 6 days after PT ( $n = 7$  mice). The plot shows the mean  $\pm$  SEM. ns = not significant, unpaired Student's *t*-tests. SVZ, subventricular zone. Source data are provided as a Source Data file.
